# Supplementary material
Source: HighWire-hosted journal article supplement (https://www.cmaj.ca/highwire/filestream/58186/field_highwire_adjunct_files/4/guide-burns-appendix_5.pdf)
Supplement: guide-burns-appendix_5.pdf [file guide-burns-appendix_5.pdf]

**Appendix 5:** Formulas for estimating the sample size for experimental and analytical survey designs\*

| Design hypothesis                                                                                                                 | Formula                                                                                                                             |
|-----------------------------------------------------------------------------------------------------------------------------------|-------------------------------------------------------------------------------------------------------------------------------------|
| <p>Group comparison (2 population means)</p> <p><math>H_0: \mu_1 = \mu_2</math><br/> <math>H_1: \mu_1 \neq \mu_2</math></p>       | $n = \frac{2\sigma^2 [z_{1-\alpha/2} + z_{1-\beta}]^2}{(\mu_1 - \mu_2)^2}$                                                          |
| <p>Group comparison (2 population proportions)</p> <p><math>H_0: P_1 - P_2 = 0</math><br/> <math>H_1: P_1 - P_2 \neq 0</math></p> | $n = \frac{\left[ z_{1-\alpha/2} \sqrt{2\bar{P}(1-\bar{P})} + z_{1-\beta} \sqrt{P_1(1-P_1) + P_2(1-P_2)} \right]^2}{(P_1 - P_2)^2}$ |

Note:  $\bar{P}$  = average proportion =  $(P_1 + P_2)/2$ ;  $P_1$  = estimated proportion (larger);  $P_2$  = estimated proportion;  $\sigma$  = estimated standard deviation (assumed to be equal for each group);  $\mu_1$  = estimated mean (larger);  $\mu_2$  = estimated mean (smaller);  $z_{1-\alpha/2}$  = standard errors associated with confidence intervals (1.00 [68%], 1.645 [90%], 1.96 [95%], 2.58 [99%]).

\*Adapted, with permission, from Lemeshow S, Hosmer DW Jr, Klar J, et al. *Adequacy of sample size in health studies*. Chichester (UK): John Wiley & Sons; 1990. p. 19,22,40.
